# Supplementary material for: Molecular characteristic of activin receptor IIB and its functions in growth and nutrient regulation in Eriocheir sinensis
Source: PeerJ journal article supplement (doi:10.7717/peerj.9673), 2020-09-01
Supplement: Supplemental_Figure_S1.pdf [file Supplemental_Figure_S1.pdf]

1  
31  
115  
199  
283  
367  
451  
535  
619  
1  
703  
29  
787  
57  
871  
85  
955  
113  
1039  
141  
1123  
169  
1207  
197  
1291  
225  
1375  
253  
1459  
281  
1543  
309  
1627  
337  
1711  
365  
1795  
393  
1879  
421  
1963  
449  
2047  
477  
2131  
505  
2215  
533  
2299

AATACCCCATGGAAATTTTAAACAGCCAAA

TATACACCAGTAAAACCCATGTAATCACCCCTAAAAACCCGACGGAGGTTTTAGAGGACTCCCCGCCAGTGGATTATGTCT  
CCTGAAAATACTCGCCATATTGGATTCGCTAACAAAATCGGGCCTGAAATACTGCTGCTGGGCGAGGCATTGCTTGACGCTGCA  
CCCTGCGGGCCCCGAGGCGAGTGGCCAGCGCACTGTGATCGGTGGGGGGCACGAGCAGGTGATGGTGTCTGCAGCTGCTGC  
AACAAAGTGTGACAGTGTCAAATTTACCCCTTCCATGAAGAAGGATACAGTGAATAATCTAGAACCATGTGCTTTGTTTTACA  
CAGTGAAGTTCCTCTTAAAATCTGTTGCTAAAGTGAAGGAAAAACAGCTTGATGAGAGCCCAGAGGGTTGCCATCGATGCAGG  
ATATGGACATGACACGGGTCTGTCATGAGGACAGATGTGACATTTGGAGGAGCTGAGGTGCCACACATGCAAGACCTGACTGG  
ATCCTGGCTGAGAGGGATCACCAAGGACAAGTGAAGGGTGGCTGAAGCTGAGGAGACCAAGGCAAGGTTGGCCAGCTGTGTG  
**ATG**GCTGGCAGCAGAAGAGTCTGTATCCTCCATCAACCATGATGATCCTGCTAACCCCTGGCAGCCTTCCCTGCCATCTCGGCC  
1 M A G S R R V L Y P P S T M M I L L T L A A F P A I S A  
CTAATACCTGAAGGGATGGCACAGCCTTCGGAAACCCCGCCAGGTGACGCACTGTGAGCTATACAACAGCACACAGTGT  
29 L I P E G M A Q P S E T P R P Q V T H C E L Y N S T Q C  
ACTGGGACAACCTCTCTCGCCTGTGTGAAGAAGGAAAGCCATCCGTGTGAGGACCTAGAGAAGGCCAACAGTCTTTGTG  
787 T G D N S L S P V C K K E S H P C E D L E K A N Q C F V  
57 GTGTGGAGTAACATGTCTGGCACGCCAGAAGTAATCTACAAGGGATGTTTATGGAATTATAAACTTGCAAAGATGAGTGCATC  
871 V W S N M S G T P E V I Y K G C L W N Y K T C K D E C I  
85 AGCACTGAGCCAGTGAACAGTCTTACAGAGCAGAAGCCTCACCTGTTTTGTGCTGCAACAACAACAAATTGTAATCAGAACTC  
955 S T E P V N S L T E Q K P H L F C C C N N N N C N Q N F  
113 TCGTGGCAGCCTAAGGTTGAGGTCCCAGCACCACCCAGAGGGCCTTTAAGAAACATGATCCCCGAGCTACTGGGTTAATG  
1039 S W Q P K V E V P S T T P E G P L R N M I P A A T G L M  
141 GCCCAGGTAACAGGGCTTACTGGAAGGATAAAACCTTATAAACATCCTGCCACCCAGGAACAGGACATGGTTGTA  
1123 A Q G N R A Y T G K R D K N L I N I L P P Q E Q D M V V  
169 CAGACGGTGGCTTGGACCCTTGGGACCCTCATCCTGTTGGTGGTTACGGTGACAGTTCTTCTACCTCTATAGGAGACAGAAA  
1207 Q T V A W T L G T L I L L V V T V T V L F Y L Y R R Q K  
197 ATGGCCAACTTTATGGCAATACCTCGAGTGGAGTCCACAGCCCTGTTTCCCTCCTCCACCGATGGGCTTGCACCCATACAG  
1291 M A N F M A I P R V E S T A L V P P S P P M G L R P I Q  
225 CTGAGGAGATCAAAGCCAGAGGCCGTTTGGTGTGTGTGGAAGGCCAACCTTCACAATGACGTTATTGTGTCAAGATCTTC  
1375 L R E I K A R G R F G A V W K A N L H N D V I A V K I F  
253 CCAGTCCAGGATAAACAGTCTGTGGCTGGTGGAGACGGAGGTGACTCCCTCCCTCAGCTGTCCCATGAGAATATCCTACACTAC  
1459 P V Q D K Q S W L V E T E V Y S L P Q L S H E N I L H Y  
281 ATTGGGCGAGAGAAGCGTGGCGATAGCCTTCCAGCTGAGTTTTGGCTTATTACAGCCTACCATGAGAGAGGCTCCTTGTGTGAC  
1543 I G A E K R G D S L Q A E F W L I T A Y H E R G S L C D  
309 TTTCTAAAGGCCAACCTCGTGACATGGGATGAACTGTGCAAGATTGGCGAGTCAATGGCCCGGGGTTAATGTACATGCATGAG  
1627 F L K A N L V T W D E L C K I G E S M A R G L M Y M H E  
337 GAGCAACCGGCTTCCAAGTGTGAGGCCCTCAAGCCTGCCATTGCCACCGAGACTTCAAAGCAAAAATGTGTTGCTGAAGAA  
1711 E Q P A S K C E A L K P A I A H R D F K S K N V L L K N  
365 GACCTGACTGCCTGCATTGCTGACTTCGGCCTTGCTTTGACCTTCCACCCTGGACAGTCAACTGGTGACTCATGGACAGGTG  
1795 D L T A C I A D F G L A L T F H P G Q S T G D T H G Q V  
393 GGCACAAGGAGGTACATGGCCCTGAAGTCTTGAAGGGGCCATCAATTTCCAGCGTATGCCTTCTTACGCATTGACATGTAT  
1879 G T R R Y M A P E V L E G A I N F Q R D A F L R I D M Y  
421 GCCTGTGGCCTTGTGCTGTGGGAGCTGCTGTCCAGATGTTCAAGCCAGATGGACCCATACCTGAGTACCACTTGCCATTTGAG  
1963 A C G L V L W E L L S R C S S P D G P I P E Y H L P F E  
449 GAGGAAGTTGGCCAGCATCAACATTGGACGACATGCAGGAGTGTGTCGTCACCAAAAAGGCTCGACCTGTCCACGACCAT  
2047 E E V G Q H P T L D D M Q E C V V T Q K A R P V I H D H  
477 TGGCGGAAGAATGCTGCCATGATGGGATTGATAGACACCATGGAGGAGTGTGGGACCATGATGCAGAGGCCCGTCTCTCAGCT  
2131 W R K N A A M M G L I D T M E E C W D H D A E A R L S A  
505 TCATGTGTGGTGGAGAGGCTGGCCAGCTTCTCAAGGAACCCAGTTTTCCCTACCTCAAATCCAGAAAGGAGTGCAGTATA  
2215 S C V V E R L A S F S R N P Q F S P T S N P Q K E S S I  
533 **TAA**GGCCAAGGTGTGGTGGCCACGTACCTGGACAAGTACCTGTGCTGTAACCGCTATGAGGGTCTGGTGGGGGAGAGGCC

561 \*  
2383 AGCCACCATGTCCCGCAGGCACCAGCTGTGTTGGGGGCCTCGTGTGTCGGCCTCAGTAACCCTCCCCCTCCCTTCTCCAATCA  
2467 GCTGCACACCACAGCCAGACACTTGGTCATATTCACAGTTACCCGGTGACACCAGTTTTGTCTGGTCAAAGAGGGTGGGTCA  
2551 GGGAAATTTCTCTTACATTTGAAAAAAAAAAGTACTTTTACTCTCAGCATCTAAATTGGCACTGATGGGTGAGAGTCTCCGTTA  
2635 GTTAGATAGATACGTCTTCTGTAATTAATTAGTGAATAGTTTGATATCCCTGGCGGTGCTTCAAATGCATTTTTATGGACTG  
2719 ATGCAAAAATCATACTTAGCGGAAGTAAATTTGGGATCCTATAGTCCAACCATAATTGATCTGGCTTGTGTGGTGGGAGAG  
2803 GGGGGAGGCTTAAAGTGTGGTGCCAAAGGGGTCAACAGGGAAGTTCTGGGACTGTTAGATAGAGCCACCCAAGTGAAGGTAGCT  
2887 TGTGGGAATCACTCCATGGCCTCATGACTCCCATAGGTTGAGATGCTCCATAAACAACCTACCCTCTCCAGCATTATTGTTGGGA  
2971 TCATGTTTCTTGTGTGGGCTTGAAAGGGTAAACAAT**ATTTA**GCTGTTATTACTGTCCAAAAAGAAATTGATGTTCTTT  
3055 GAAATACTTACACTTATTGGTATCGGCTGTTT**ATTTA**TGTTACGAACATGCAAGAAGGAAAACCTGTAC**ATTTA**GTGCAGACTA  
3139 TAGCATGCGCAGCTGTAACATAGAAGAATGAAAGAGGATCTCATGGTGCCTGTTGCCATAATGGAAGAAGCACCAGAGGTAA  
3223 AATTATTTTCGTAAGATCTAAATAAAATTTCAAGAGGAATGTTTTACGTGCCACCCACACAGGACCGTCTTGGGCATTCC  
3307 TACCTCTGAATCCTCACTGTAAGTCTCCTGATGTGAGTTGAGGAGCTGTGGTGTGCTTCCATCTGTAGGACGGCTGTGGAAA  
3391 GTGAATCTGAATCTTCATCACCATCCGATTGTTGGTGTGTACGATGGAGCTGGAGATCGTGCATGGAAGTGGTGTTCACAG  
3475 CTGTCAGTGCATTTCCGTCAATGAGAAACATGGTGTCT**ATTTA**ACCATCAACAGACAATTGCATCCAGCCATTAGTTTTGCA  
3559 GCTCAGTGCAGCTTCAAGCTCAGTAACTCAGGCAAAAGGAAAACTATGGTTGTGCCTCCCTGGCAAGTGTCTAATGGCGTATGG  
3643 GGAAGAGTGGCTGTGGGTTTCGTCTGTCCCTAAACTGAAATTTCCCATCTGTGTTGAAAACCTGGATGGATTGCAGTGTCTAATCA  
3727 GTGAAGCTTTTGTTTTAATTTTGGCTTAGAAAGACTCTATAGTGTGAATGATTTCTACATAAAAAAGAAACATAGTATTTTCCAG  
3811 CCCACTATGTTCAATATCTGTGTGTCGTCAGTGCCAGCAGAGCTCCGACACTGTCTGCTGGGCTAGTAGGACACAAGACGAGCC  
3895 CAGCCATTGTGAGGCCAGTGGAGGGCCACAATCGGGCTGCCCTTTACTGTCAGCTCAGGACAAACTTCAGTGACCACCCTGTT  
3979 ACCACTTTGCCCCACACAGTACATACATACCCTCATCTGTATATATTTGCGCCTTGTGTTAGCATTACACAAGTTGTCCG  
4063 CAACAAAATGAAACTAGTGATTATTTAAATGTGGTTTATTTGTGAAACCAATGGTGCCTTTTTTCTTCTATTTCCAAGATGAA  
4147 TGTTAATTGTTAAACTGAATCAAGCCAGCATGAGTGTGAAAACAAAGAGGCACATTGCCACTCAGCATTGTAATACCTCA  
4231 TTATTGTACACAGCATTATGACTTGTGACATCCAGACCTCACCATGACAGATCCTGAATGCTTATAAGCAGAATTCTATTACTT  
4315 CTTGATTGTGTATAGTAAGTTCTCTCTTGTGTTGGAACTATAGTTGTTGAAAGCCATAGAAAGGTCATTTTATTGATCCAGAA  
4399 AACTTAAAAGAGGAACTAAAGTAAACTCTGGTCTCTGCA**ATTTA**ATTCTTGTGATTGTAGTTAAGCCATTAAGAGGCTATGAG  
4483 AGAGAAAAGAGAGAGAGAGACTGTAAATGAGAAAATAGATAAAAGCAAAGAGAAAATTGAACTTTGCAAACTTTGACCTTG  
4567 GGAGACTTGAGTTCATCTGCTGTGAGGCCTTCTGAGGCGAGGACGAGGCAGTGTGACTGTCAAACGAGGACTGGAGGCGTCATG  
4651 TGATAGATTGGATACGTACAGGGACTTTTGGGCACAGGTACCGCCTGTGCCTTGGGGAACCACTGTCACTGTTACAAGACTGT  
4735 GTATGGGGGAAATTTGCTATTTTCTTGTACTTCCCTGAATTA**ATTTA**ATTTTATTTTATGTTTACTTACTGTTAGGACACCCC  
4819 CTTTATCCTTGTGTTCCCTTGCAGGCATGAATGTAATGTCTCATATATCTGTATCCCATGTAGTAGTATAAAGTAATCGATATT  
4903 GAAAAAAAAAAAAA
